# Supplementary material
Source: PubMed Central journal article supplement (PMC5986206)
Supplement: supp_RA117.001653_134930_1_supp_97024_p5pfcl.pdf [file supp_RA117.001653_134930_1_supp_97024_p5pfcl.pdf]

**Supporting Information**

**Table S1. Primers for qPCR or ChIP**

| Gene name           | Sequence                                                                 |
|---------------------|--------------------------------------------------------------------------|
| Human <i>SHP</i>    | F: 5'- GGTGCCCAGCATACTCAAGAA-3'<br>R: 5'- GGACTTCACACAGCACCCAGT-3'       |
| Human <i>HPRT1</i>  | F: 5'- TGACACTGGCAAACAATGCA-3'<br>R: 5'- GGTCCTTTTCACCAGCAAGCT-3'        |
| Mouse <i>Shp</i>    | F: 5'-TGAGCTGGGTCCCAAGGA-3'<br>R: 5'-CCTGGCACATCTGGGTTGA-3'              |
| Mouse <i>Pparγ</i>  | F: 5'-TCGCTGATGCACTGCCTATG-3'<br>R: 5'-GAGAGGTCCACAGAGCTGATT-3'          |
| Mouse <i>Mttp</i>   | F: 5'-CATGCTTCTTCATCTGGTCCG-3'<br>R: 5'-CACTTTGTCTTGCTGGGCCT-3'          |
| Mouse <i>ApoB</i>   | F: 5'- TTGGCAAACCTGCATAGCATCC-3'<br>R: 5'- TCAAATTGGGACTCTCCTTTAGC-3'    |
| Mouse <i>Hprt1</i>  | F: 5'- CGTCGTGATTAGCGATGATGA-3'<br>R: 5'- CACACAGAGGGCCACAATGT-3'        |
| Mouse <i>TNFα</i>   | F: 5'- CGTGGAACCTGGCAGAAGAG -3'<br>R: 5'- ACAAGCAGGAATGAGAAGAGG -3'      |
| Mouse <i>Ccl2</i>   | F: 5'- TTA AAAACCTGGATCGGAACCAA -3'<br>R: 5'- GCATTAGCTTCAGATTTACGGGT-3' |
| Mouse <i>Nos2</i>   | F: 5'- AATCTTGGAGCGAGTTGTGG -3'<br>R: 5'- CAGGAAGTAGGTGAGGGCTTG -3'      |
| Mouse <i>Arg1</i>   | F: 5'- CTCCAAGCCAAAGTCCTTAGAG -3'<br>R: 5'- AGGAGCTGTCATTAGGGACATC -3'   |
| Mouse <i>CD163</i>  | F: 5'- TGGGTGGGAAAGCATAACT -3'<br>R: 5'- AAGTTGTCGTCACACACCGT -3'        |
| Mouse <i>Col1A1</i> | F: 5'- GACGCCATCAAGGTCTACTGC -3'<br>R: 5'- GGAAGGTCAGCTGGATAGCG -3'      |
| Mouse <i>Alb</i>    | F: 5'- TGCTTTTTCCAGGGGTGTGTT -3'<br>R: 5'- TTA CTTCTGCACTAATTTGGCA -3'   |
| Mouse <i>F4/80</i>  | F: 5'- CCCAGTGTCTTACAGAGTG -3'<br>R: 5'- GTGCCCAGAGTGGATGTCT -3'         |
| Mouse <i>Hhip</i>   | F: 5'- TGAAGATGCTCTCGTTTAAGCTG -3'                                       |

|                      |                                                                        |
|----------------------|------------------------------------------------------------------------|
|                      | R: 5'- CCACCACACAGGATCTCTCC -3'                                        |
| Mouse <i>IL-6</i>    | F: 5'- AACGATGATGCACTTGCAGA -3'<br>R: 5'- GAGCATTGGAAATTGGGGTA -3'     |
| Mouse <i>Tgfβ1</i>   | F: 5'- CTCCCGTGGCTTCTAGTGC -3'<br>R: 5'- GCCTTAGTTTGGACAGGATCTG -3'    |
| Mouse <i>Ctgf</i>    | F: 5'- GGGCCTCTTCTGCGATTC -3'<br>R: 5'- ATCCAGGCAAGTGCATTGGTA -3'      |
| Mouse <i>Col1A2</i>  | F: 5'- GCAGGGTTCCAACGATGTTG -3'<br>R: 5'- GCAGCCATCGACTAGGACAGA -3'    |
| Mouse <i>Srebp1c</i> | F: 5'- GATGTGCGAACTGGACACAG -3'<br>R: 5'- CATAGGGGGCGTCAAACAG -3'      |
| Mouse <i>Me1</i>     | F: 5'- GTCGTGCATCTCTCACAGAAG -3'<br>R: 5'- TGAGGGCAGTTGGTTTTATCTTT -3' |
| Mouse <i>ACC1</i>    | F: 5'- ATGGGCGGAATGGTCTCTTTC -3'<br>R: 5'- TGGGGACCTTGTCTTCATCAT -3'   |
| Mouse <i>Acly</i>    | F: 5'- CAGCCAAGGCAATTCAGAGC -3'<br>R: 5'- CTCGACGTTTGATTAAGTGTCT -3'   |
| Mouse <i>Cpt1a</i>   | F: 5'- CTCCGCCTGAGCCATGAAG -3'<br>R: 5'- CACCAGTGATGATGCCATTCT -3'     |
| Mouse <i>ACC2</i>    | F: 5'- CCTTTGGCAACAAGCAAGGTA -3'<br>R: 5'- AGTCGTACACATAGGTGGTCC -3'   |
| Mouse <i>Srebp2</i>  | F: 5'- GCAGCAACGGGACCATTCT -3'<br>R: 5'- CCCCATGACTAAGTCCTTCAACT -3'   |
| Mouse <i>Abca1</i>   | F: 5'- AAAACCGCAGACATCCTTCAG -3'<br>R: 5'- CATAACGAACTCGTTCACCC -3'    |
| Mouse <i>Abcg5</i>   | F: 5'- AGGGCCTCACATCAACAGAG -3'<br>R: 5'- GCTGACGCTGTAGGACACAT -3'     |
| Mouse <i>IL1</i>     | F: 5'- CCTGTGTTTTCTCCTTGCCT -3'<br>R: 5'- GCCTAATGTCCCCTTGAATCAA -3'   |
| <i>c-Jun</i> CHIP P1 | F: 5'- CCCTGGTACAGCCTGGGTTA -3'<br>R: 5'- ATGAAGTGGCCATTGCAGG -3'      |
| <i>c-Jun</i> CHIP P2 | F: 5'- GGCTGGCCTTGAAGTCAAGAA -3'<br>R: 5'- TGGTGTCTCTTCACAGCAAT -3'    |

|                   |                                                                      |
|-------------------|----------------------------------------------------------------------|
| LRH1<br>ChIP L1   | F: 5'- TGGCTCCTTGGCTCAGTGA -3'<br>R: 5'- TACCAGGGCACCAAGGTCTC -3'    |
| LRH1<br>ChIP L2+3 | F: 5'- GGTCAGCGTGTATGCATTGTG -3'<br>R: 5'- TTTATATCCTTGATGGGCGGG -3' |
